# Supplementary material for: A Genome-Wide Gene Expression Signature of Environmental Geography in Leukocytes of Moroccan Amazighs
Source: PLOS journal article supplement (doi:10.1371/journal.pgen.1000052), 2008-04-10

**Figure S6. Results of methylation analysis.** Histograms show the distribution by chromosome of CpG sites of (A) the 1,505 CpG sites represented on Illumina's GoldenGate Methylation Cancer Panel I array; (B) the 97 differentially methylated CpG sites for the sex effect at  $P < 0.05$  (ANOVA); (C) the 69 differentially methylated CpG sites between locations at  $P < 0.05$ , and (D) the 24 differentially methylated CpG sites for the sex and location interaction effect at  $P < 0.05$ . The X chromosome is shown in dark green. Panel B can be considered a positive control for the success of the analysis since methylation is known to preferentially mark X-linked loci.

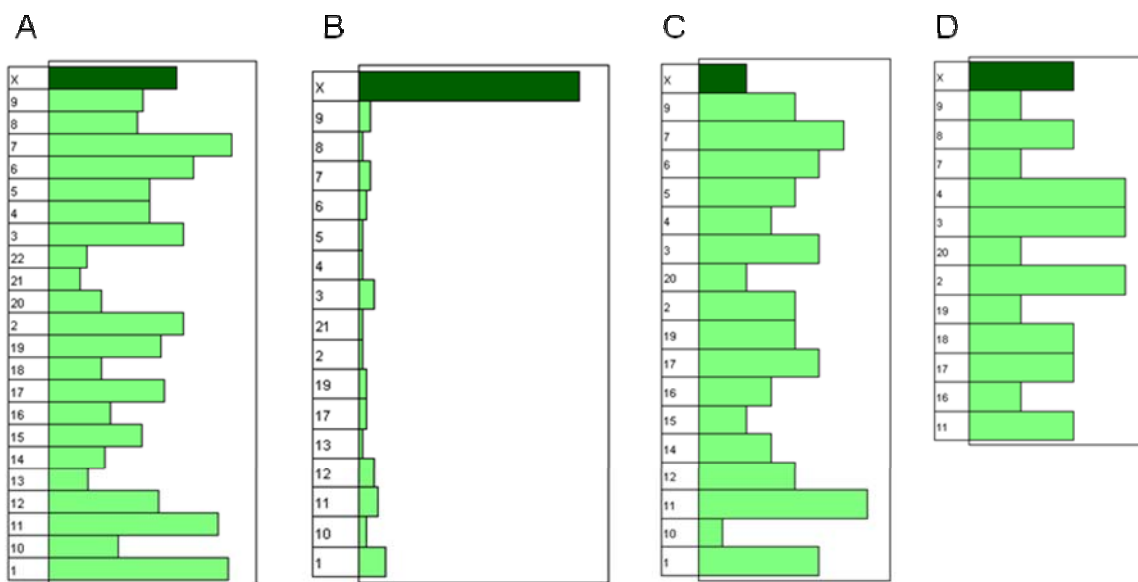

Supplement: S6 (10.1371/journal.pgen.1000052.s006) [file journal.pgen.1000052.s006]
