# Supplementary material for: A Genome-Wide Gene Expression Signature of Environmental Geography in Leukocytes of Moroccan Amazighs
Source: PLOS journal article supplement (doi:10.1371/journal.pgen.1000052), 2008-04-10

**Figure S7. Correlations among Interleukin signaling components.** The three plots show the average relative transcript abundance (log base 2 scale) for the indicated genes in the Urban (U: Anza), Nomadic (N: Bedouin), and Rural (R: Sebt-Nabor) locations. *P* values in brackets indicate the significance of the 3-way location term from mixed model ANOVA. Across all 46 individuals, IL-8 is negatively correlated with IRAK2 ( $P = 0.0008$ ), IRAK1 is negatively correlated with IRAKBP1 ( $P = 0.008$ ), and IRAK3 is positively correlated with IRAK4 ( $P = 0.004$ ).

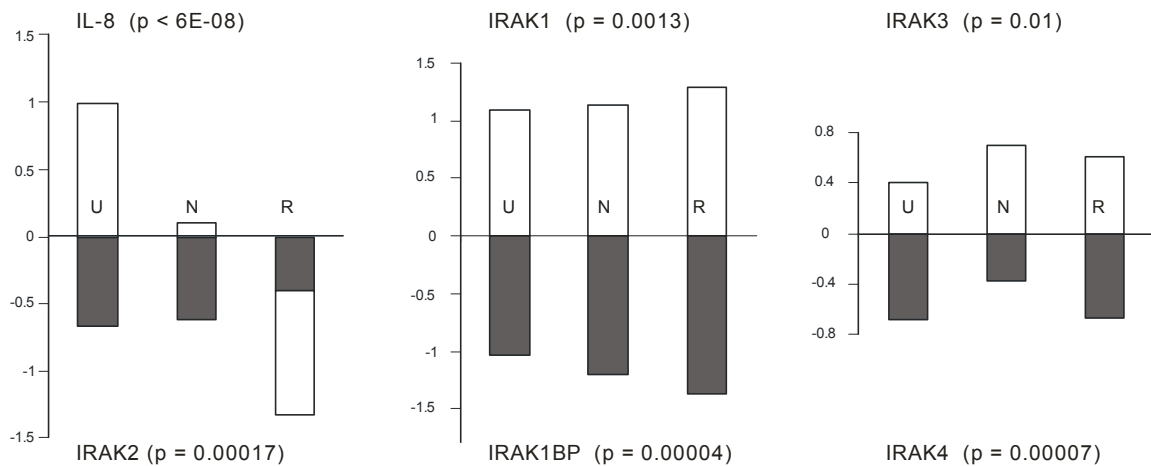

Supplement: S7 (10.1371/journal.pgen.1000052.s007) [file journal.pgen.1000052.s007]
