# Supplementary material for: A Genome-Wide Gene Expression Signature of Environmental Geography in Leukocytes of Moroccan Amazighs
Source: PLOS journal article supplement (doi:10.1371/journal.pgen.1000052), 2008-04-10
Supplement: S11 (10.1371/journal.pgen.1000052.s011) [file journal.pgen.1000052.s011]

**Table S4. Top 15 networks generated by Ingenuity from the list of genes differentially expressed (1% FDR) for each location pairwise comparison.** The genes called Focus Genes are genes that meet the 1% FDR cutoff in addition to the presence of at least one other full-length, wild-type gene or protein in the IPKB that interacts (directly or indirectly) with these genes. The networks are sorted by their score that is from the likelihood that the Focus Genes that are part of a network are found therein by random chance alone.

| Network | Analysis         | Score | Focus Genes | Top Functions                                                                                          |
|---------|------------------|-------|-------------|--------------------------------------------------------------------------------------------------------|
| 1       | Nomadic_vs_Rural | 43    | 30          | Cell Cycle, Cancer, Gastrointestinal Disease                                                           |
| 1       | Nomadic_vs_Urban | 41    | 31          | Protein Synthesis, Cancer, Cell Cycle                                                                  |
| 1       | Rural_vs_Urban   | 38    | 35          | RNA Post-Transcriptional Modification, Cellular Assembly and Organization, Protein Synthesis           |
| 2       | Nomadic_vs_Urban | 41    | 31          | Cancer, Cell Cycle, Reproductive System Disease                                                        |
| 2       | Nomadic_vs_Rural | 40    | 29          | Gene Expression, Cell Morphology, Connective Tissue Development and Function                           |
| 2       | Rural_vs_Urban   | 35    | 34          | Cell Morphology, Cellular Assembly and Organization, Cellular Development                              |
| 3       | Nomadic_vs_Urban | 39    | 30          | Cellular Development, Post-Translational Modification, Cellular Growth and Proliferation               |
| 3       | Nomadic_vs_Rural | 36    | 27          | Cellular Assembly and Organization, Cancer, Cell Death                                                 |
| 3       | Rural_vs_Urban   | 35    | 34          | Viral Function, Cellular Function and Maintenance, Post-Translational Modification                     |
| 4       | Nomadic_vs_Urban | 37    | 29          | Nucleic Acid Metabolism, Gene Expression, Cancer                                                       |
| 4       | Nomadic_vs_Rural | 36    | 27          | Cancer, Cellular Growth and Proliferation, Cell Signaling                                              |
| 4       | Rural_vs_Urban   | 35    | 34          | Protein Degradation, Gene Expression, DNA Replication, Recombination, and Repair                       |
| 5       | Nomadic_vs_Urban | 37    | 29          | Cell Signaling, Immune Response, Carbohydrate Metabolism                                               |
| 5       | Nomadic_vs_Rural | 34    | 26          | Vitamin and Mineral Metabolism, Lipid Metabolism, Cancer                                               |
| 5       | Rural_vs_Urban   | 33    | 33          | Cellular Development, Reproductive System Development and Function, Cellular Assembly and Organization |
| 6       | Nomadic_vs_Urban | 37    | 29          | Cancer, Cell Death, Reproductive System Disease                                                        |
| 6       | Rural_vs_Urban   | 33    | 33          | Immune Response, Hematological System Development and Function, Cellular Development                   |
| 6       | Nomadic_vs_Rural | 30    | 24          | Post-Translational Modification, Gene Expression, Cell Cycle                                           |
| 7       | Nomadic_vs_Urban | 35    | 28          | DNA Replication, Recombination, and Repair, Cell Cycle, Cellular Assembly and Organization             |

|    |                  |    |    |                                                                                                                           |
|----|------------------|----|----|---------------------------------------------------------------------------------------------------------------------------|
| 7  | Rural_vs_Urban   | 33 | 33 | Cardiovascular System Development and Function, Protein Degradation, Cell Signaling                                       |
| 7  | Nomadic_vs_Rural | 28 | 23 | Cell-To-Cell Signaling and Interaction, Cellular Assembly and Organization, Hematological System Development and Function |
| 8  | Nomadic_vs_Urban | 35 | 28 | Molecular Transport, Protein Trafficking, Cell Death                                                                      |
| 8  | Rural_vs_Urban   | 31 | 32 | RNA Post-Transcriptional Modification, Cellular Assembly and Organization, Carbohydrate Metabolism                        |
| 8  | Nomadic_vs_Rural | 26 | 22 | Cancer, Hematological Disease, Cellular Development                                                                       |
| 9  | Nomadic_vs_Urban | 35 | 28 | Protein Synthesis, Gene Expression, Cell Cycle                                                                            |
| 9  | Rural_vs_Urban   | 31 | 32 | Cellular Assembly and Organization, Vitamin and Mineral Metabolism, Lipid Metabolism                                      |
| 9  | Nomadic_vs_Rural | 19 | 18 | Immune Response, Neurological Disease, Cardiovascular System Development and Function                                     |
| 10 | Nomadic_vs_Urban | 33 | 27 | Hematological System Development and Function, Immune and Lymphatic System Development and Function                       |
| 10 | Rural_vs_Urban   | 31 | 32 | Gene Expression, Cardiovascular System Development and Function, Cell-To-Cell Signaling and Interaction                   |
| 10 | Nomadic_vs_Rural | 18 | 17 | Cancer, Reproductive System Disease, Renal and Urological Disease                                                         |
| 11 | Nomadic_vs_Urban | 27 | 24 | Cell Signaling, Tissue Development, Cardiovascular System Development and Function                                        |
| 11 | Nomadic_vs_Rural | 18 | 17 | Ophthalmic Disease, Cellular Function and Maintenance, Cellular Assembly and Organization                                 |
| 12 | Rural_vs_Urban   | 31 | 32 | Cardiovascular Disease, Metabolic Disease, RNA Post-Transcriptional Modification                                          |
| 12 | Nomadic_vs_Urban | 27 | 24 | Cardiovascular System Development and Function, Tissue Morphology, Lipid Metabolism                                       |
| 12 | Nomadic_vs_Rural | 16 | 16 | Lipid Metabolism, Small Molecule Biochemistry, Molecular Transport                                                        |
| 13 | Rural_vs_Urban   | 31 | 32 | Cell Signaling, Gene Expression, Cancer                                                                                   |
| 13 | Nomadic_vs_Urban | 25 | 23 | Cellular Assembly and Organization, Cellular Movement, Gene Expression                                                    |
| 13 | Nomadic_vs_Rural | 16 | 16 | Cell Signaling, Immune Response, Hematological System Development and Function                                            |
| 14 | Rural_vs_Urban   | 31 | 32 | Gene Expression, Carbohydrate Metabolism, Cancer                                                                          |
| 14 | Nomadic_vs_Urban | 19 | 19 | Immune Response, Cancer, Tumor Morphology                                                                                 |
| 14 | Nomadic_vs_Rural | 16 | 16 | Cancer, Cell Cycle, Gene Expression                                                                                       |
| 15 | Rural_vs_Urban   | 29 | 31 | Cellular Growth and Proliferation, Hematological System Development and Function, Immune Response                         |
| 15 | Nomadic_vs_Rural | 16 | 16 | Dermatological Diseases and Conditions, Gene Expression, Cell Signaling                                                   |
| 15 | Nomadic_vs_Urban | 14 | 16 | Cellular Development, Cellular Growth and Proliferation, Reproductive System Disease                                      |
